# Supplementary material
Source: publisher figshare collection journal article supplement (https://tandf.figshare.com/ndownloader/files/17437577)
Supplement: Supplementary file 1 [file 17437577]

**SUPPLEMENTAL TABLES**

**Table S1: Estimates of All Study Populations vs. Sensitivity Analyses of Subgroup Populations**

| **All study Populations** | **Q** | **I2** | **ES (CI)** |
| --- | --- | --- | --- |
| **Overall Effect Size (n=35)** | **35.5** | **4.11** | **42.8 (39.0-46.7)** |
| **Year 1** (n=9) | 6.0 | -32.9 | 34.9 (0.23-46.0) |
| **Year 2-5** (n=17) | 21.8 | 26.6 | 43.2 (39.4-47.0) |
| **Year 6 and Beyond** (n=9) | 6.8 | -17.2 | 49.9 (44.7-55.1) |
| **Subgroup Populations** |  |  |  |
| **Age range between 16 and 67** (n=17) | 24.7 | 35.2 | 40.0 (39 – 44.4) |
| **Moderate and sever injury only** (n=24) | 25.8 | 10.8 | 40.1 (35.7-44.6) |
| **Greater than 90% participants employed preinjury** (n=10) | 5.0 | -78.3 | 45.9 (35.1-56.7) |
| **Injury Severity Classification by Glasgow Coma Scale only** (n=29) | 27.4 | -1.92 | 40.2 (36.1-44.5) |
| **Students** (n=19) | 17.4 | -3.4 | 41.4 (36.1-46.7) |

**Table S2: Risk of bias assessment according to Newcastle-Ottawa Scale (n=38)**

| **Author, Year** | **Selection** | **Comparability** | **Outcome** | **Total Score** |
| --- | --- | --- | --- | --- |
| **Andelic, 2012 (50)** | 4 | 1 | 2 | 7 |
| **Arango-Lasprilla, 2008 (44)** | 4 | 1 | 1 | 6 |
| **Arango-Lasprilla, 2009 (59)** | 4 | 1 | 3 | 8 |
| **Arango-Lasprilla, 2011 (60)** | 4 | 1 | 3 | 8 |
| **Benedictus, 2010 (51)** | 4 | 1 | *0 | *5 |
| **Bushnik, 2003 (52)** | 4 | 1 | 1 | 6 |
| **Colantonio, 2004 (70)** | 4 | 1 | 1 | 6 |
| **Corrigan, 2007 (47)** | 4 | 1 | 1 | 6 |
| **Cuthbert, 2015 (48)** | 4 | 1 | 2 | 7 |
| **Dahm, 2014 (71)** | 4 | 1 | 2 | 7 |
| **Dahm, 2015 (72)** | 4 | 1 | 2 | 7 |
| **DeKoning, 2015 (53)** | 4 | 2 | 2 | 8 |
| **Dillahunt-Aspillaga, 2017 (45)** | 3 | 1 | 2 | 6 |
| **Dillahunt-Aspillaga, 2017b (54)** | 3 | 1 | 1 | *5 |
| **Doig, 2001 (61)** | 4 | 1 | 2 | 7 |
| **Forslund, 2013 (7)** | 4 | 1 | 3 | 8 |
| **Forslund, 2014 (35)** | 4 | 1 | 3 | 8 |
| **Gary, 2009 (62)** | 3 | 1 | 3 | 7 |
| **Gary, 2010 (73)** | 4 | 1 | 3 | 8 |
| **Gollaher, 1998 (63)** | 3 | 1 | 2 | 6 |
| **Goran, 1997 (74)** | 4 | 1 | 2 | 7 |
| **Grauwmeijer, 2012 (64)** | 4 | 1 | 3 | 8 |
| **Grauwmeijer, 2017 (75)** | 4 | 1 | 3 | 8 |
| **Hoofien, 2001 (76)** | 3 | *0 | 3 | 6 |
| **Ketchum, 2012 (55)** | 3 | 1 | 1 | *5 |
| **Kreutzer, 2003 (65)** | 4 | 1 | 3 | 8 |
| **Novack, 2001 (56)** | 4 | 2 | 2 | 8 |
| **Odfaard, 2018 (49)** | 4 | 2 | 2 | 8 |
| **Odgaard, 2017 (46)** | *2 | 1 | 1 | 8 |
| **Parks, 2010 (66)** | 4 | 1 | 1 | 6 |
| **Ponsford, 1995 (67)** | 3 | 1 | 2 | 6 |
| **Ponsford, 2014 (77)** | 4 | 1 | 2 | 7 |
| **Ponsford, 2015 (68)** | 4 | 1 | 3 | 8 |
| **Ruet, 2017 (16)** | 4 | 1 | 3 | 8 |
| **Schönberger, 2011 (57)** | 4 | 1 | 2 | 7 |
| **van Der Horn, 2013 (58)** | 4 | 1 | 1 | 6 |
| **Vitaz, 2003 (69)** | 4 | *0 | 2 | 6 |
| **Walker, 2006 (43)** | 4 | 2 | 2 | 8 |

*indicates
